# Supplementary material for: Molecular Dynamics Simulations of Matrix Metalloproteinase 13 and the Analysis of the Specificity Loop and the S1′−Site
Source: MDPI journal article supplement (doi:10.3390/ijms241310577), 2023-06-24
Supplement: s1 [file s1]

# Supporting Information

## Molecular Dynamics Simulations of Matrix Metalloproteinase 13 and the Analysis of the Specificity Loop and the S1'-site

Jun Yong Choi <sup>1,2,\*</sup>, and Eugene Chung <sup>1</sup>

<sup>1</sup>Department of Chemistry and Biochemistry, Queens College, Flushing, NY 11367, USA

<sup>2</sup>Ph.D. Programs in Chemistry and Biochemistry, The Graduate Center of the City University of New York, New York, NY 10016, USA

\*Correspondence: junyong.choi@qc.cuny.edu; Tel.: +1-718-997-3279

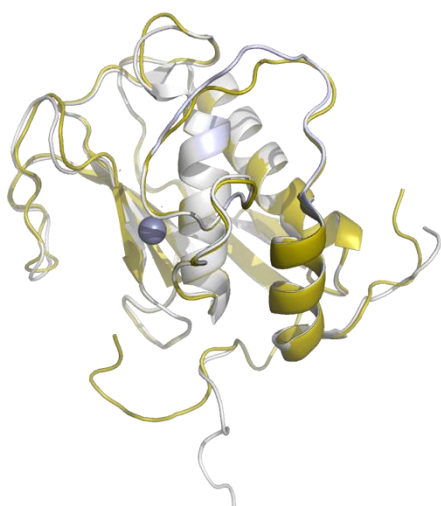

Figure S1. The structure alignment of apo-MMP-13 from the AlphaFold database (gold, identifier: AF-P45452-F1-model\_v4) to the X-ray co-crystal structure of MMP-13 – 1UA complex (light blue, PDB code: 4L19)

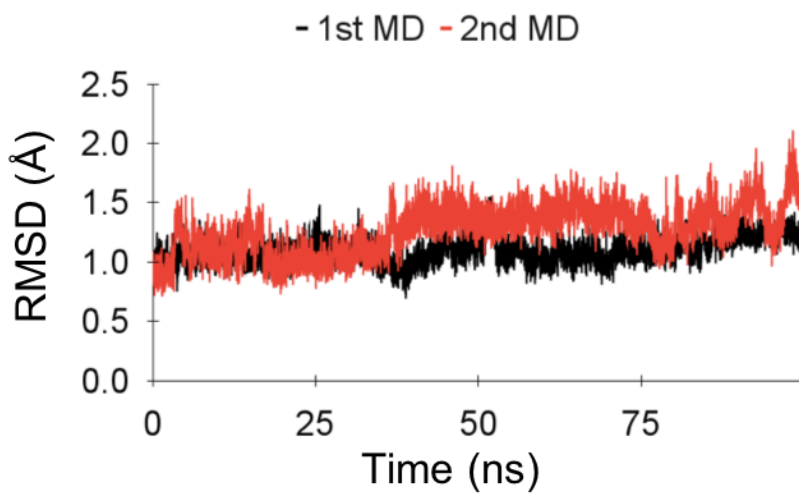

Figure S2. RMSD of two MD simulations of MMP-13 – 1UA complex.

A

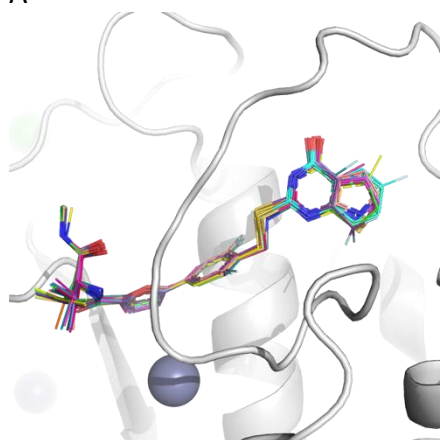

B

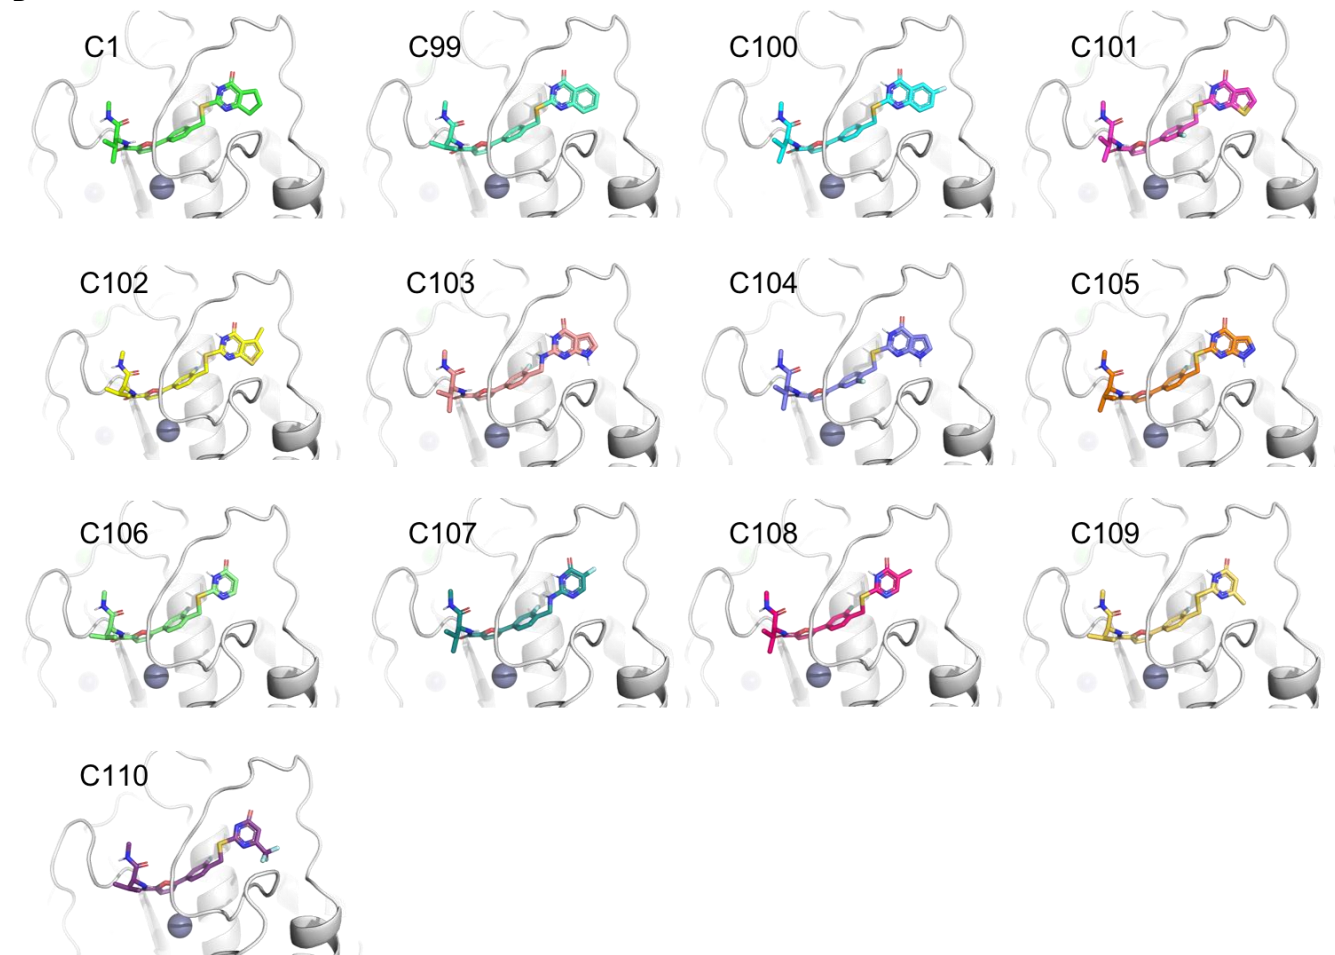

Figure S3. Glide docking results of C99-C110 to MMP-13: (A) The binding poses of all ligands are overlaid based on the binding pose of C1 in the X-ray co-crystal structure (PDB code: 5UWL); (B) The individual view of the bind poses of all ligands from docking studies.

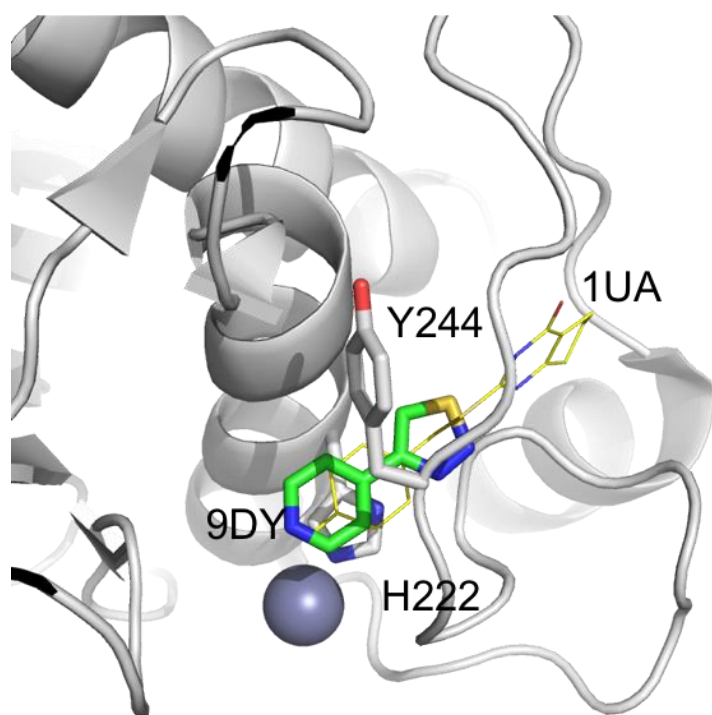

Figure S4. X-ray co-crystal structure of MMP-13 – 9DY (PDB code: 7JU8). The fragment (9DY, 4-(1,2,3-thiadiazole-4-yl)pyridine) is green. The imaginary 1UA structure is present as a yellow wire for comparison.

Table S1. The results of 10 independent MD simulations of MMP-13 – 1UA.

| MD run | coordinate                     | Binding pose | $\Delta G_{\text{binding}} (N=20)^a$ | $\Delta G_{\text{MM/GBSA}} (N=1000)^b$ |
|--------|--------------------------------|--------------|--------------------------------------|----------------------------------------|
| 1      | PDB (4L19)                     | Pose1        | -13.3 ( $\pm 2.9$ )                  | -35.7 ( $\pm 2.0$ )                    |
| 2      | PDB (4L19)                     | Pose2        | -20.6 ( $\pm 4.2$ )                  | -42.2 ( $\pm 2.5$ )                    |
| 3      | 5 ps equilibration in MD run1  | Pose1        | -14.6 ( $\pm 3.5$ )                  | -35.1 ( $\pm 2.1$ )                    |
| 4      | 5 ps equilibration in MD run2  | Open         | -13.0 ( $\pm 3.6$ )                  | -35.1 ( $\pm 2.0$ )                    |
| 5      | 10 ps equilibration in MD run1 | Open         | -14.9 ( $\pm 5.3$ )                  | -35.0 ( $\pm 2.0$ )                    |
| 6      | 10 ps equilibration in MD run2 | Pose2        | -20.3 ( $\pm 4.5$ )                  | -42.1 ( $\pm 2.6$ )                    |
| 7      | 15 ps equilibration in MD run1 | Pose1        | -12.7 ( $\pm 5.1$ )                  | -35.5 ( $\pm 2.0$ )                    |
| 8      | 15 ps equilibration in MD run2 | Open         | -15.0 ( $\pm 4.9$ )                  | -35.4 ( $\pm 1.9$ )                    |
| 9      | 20 ps equilibration in MD run1 | Pose1        | -12.6 ( $\pm 3.8$ )                  | -35.5 ( $\pm 1.9$ )                    |
| 10     | 20 ps equilibration in MD run2 | Open         | -13.3 ( $\pm 2.9$ )                  | -35.3 ( $\pm 1.9$ )                    |

<sup>a</sup> MM/GBSA calculation with the normal mode entropy approximation.

<sup>b</sup> MM/GBSA calculation without the entropy approximation

Table S2. Solute-solvent hydrogen bond analysis of C1 from the MD simulations of MMP-13 – C1 complex

| Amino acid | count | Fractions |
|------------|-------|-----------|
| LIG@O3     | 21669 | 1.0835    |
| LIG@O1     | 18040 | 0.9020    |
| LIG@O4     | 13484 | 0.6742    |

Table S3. Water-bridged hydrogen bond analysis of C1 from the MD simulations of MMP-13 – C1 complex

| Amino acid | Frames (total: 20,000) |
|------------|------------------------|
| G183       | 4046                   |
| L185       | 273                    |
| P242       | 95                     |
| Y244       | 883                    |

Table S4. Structures of ligands used in MD simulations

| Ligand code | Structure                                                                           |  | Ligand code | Structure                                                                             |
|-------------|-------------------------------------------------------------------------------------|--|-------------|---------------------------------------------------------------------------------------|
| 1UA         | 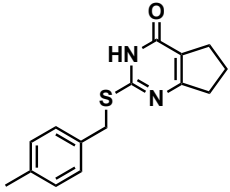   |  | C104        |    |
| C1          |    |  | C105        |    |
| C2          |  |  | C106        |  |
| C99         |  |  | C107        |  |

|      |                                                                                     |  |      |                                                                                      |
|------|-------------------------------------------------------------------------------------|--|------|--------------------------------------------------------------------------------------|
| C100 | 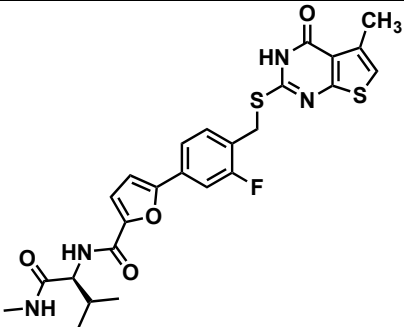   |  | C108 |   |
| C101 |    |  | C109 |   |
| C102 |   |  | C110 |  |
| C103 |  |  |      |                                                                                      |
